# Supplementary material for: Mitral Valve Surgery for Mitral Regurgitation Results in Reduced Left Ventricular Ejection Fraction in Barlow’s Disease as Compared with Fibro-Elastic Deficiency
Source: MDPI journal article supplement (doi:10.3390/jcdd11030071), 2024-02-21
Supplement: s1 [file s1]

## Supplementary data

Table S1: Subanalysis of LV remodelling parameters at follow-up in patients who underwent mitral valve repair

|                                           | All patients<br>(n=76) | BD<br>(n=20)       | FED<br>(n=56)      | P-value<br>(BD vs<br>FED) |
|-------------------------------------------|------------------------|--------------------|--------------------|---------------------------|
| Follow-up LV EDVi<br>(ml/m <sup>2</sup> ) | 65.1 ± 15.6            | 67.5 ± 17.5        | 64.2 ± 14.9        | 0.771 °                   |
| Follow-up LV ESVi<br>(ml/m <sup>2</sup> ) | 29.1 ± 9.0             | 30.9 ± 10.4        | 28.4 ± 8.3         | 0.603 °                   |
| Follow-up LVEF (%)                        | 55.3 (51.8 – 60.0)     | 55.0 (51.0 – 56.5) | 57.0 (52.2 – 61.0) | 0.059 °                   |
| Δ LV EDVi (ml/m <sup>2</sup> )            | -21.5 ± 16.6           | -22.8 ± 15.0       | -21.0 ± 17.2       | 0.771 °                   |
| Δ LV ESVi (ml/m <sup>2</sup> )            | -5.8 ± 8.6             | -6.1 ± 7.4         | -5.7 ± 9.1         | 0.603 °                   |
| Δ LVEF (%)                                | -4.2 ± 7.5             | -5.7 ± 8.5         | -3.7 ± 7.1         | 0.059 °                   |

Values are mean ± standard deviation or median (IQR)

° P-values are corrected for respective baseline values.

LVEDVi, indexed left ventricular end-diastolic volume; LVESVi, indexed left ventricular end-systolic volume;  
LVEF, left ventricular ejection fraction
